# Supplementary material for: Meteorological and evaluation datasets for snow modelling at 10 reference sites: description of in situ and bias-corrected reanalysis data
Source: Copernicus journal article supplement (doi:10.5194/essd-11-865-2019), 2019-06-17
Supplement: Supplementary file 1 [file Sites_metadata.xlsx]

## Sheet: Col de Porte
Forcing data	Instrument	Instrument height	Heated?	Ventilated?	% gap filled or corrected (2008-2017)	Correction method	Gap-filling method	Comments
Incoming shortwave radiation	Kipp & Zonen CM7 -> Kipp & Zonen CM14	1.2 m above snow (moved ~ weekly)	Yes	Yes	48.1	When night-time incoming shortwave radiation < 0 W/m-2 SWdown-cor is forced to 0. The high percentage of corrected values is due to this correction.	Reflected radiation and albedo from subsequent hours used during snowfall or data taken from SAFRAN meteorological analysis or interpolation.	The sensor is cleaned automatically hourly when air temperature is below 5°C.
Incoming longwave radiation	Eppley PIR-> Kipp & Zonen CG4 -> Kipp & Zonen CGR4	1.2 m above snow (moved ~ weekly)	Yes	Yes	2.09		Application of the Berliand formula to air temperature measurement or interpolation or data taken from SAFRAN meteorological analysis or interpolation	The sensor is cleaned automatically hourly when air temperature is below 5°C.
Precipitation	GEONOR (200 cm2)	3 m	Yes		100	All measurements are corrected by WMO recommendations depending on precipitation phase, air temperature and windspeed.	Through duplicate instruments, SAFRAN meteorological analysis or linear interpolation.	Partitioned into rain and snow manually using all possible ancillary information > 1999 Correction using Førland et al. (1996) since 1999.
Air temperature	PT100	1.5 m above snow (moved ~ weekly)		Yes	0.99		Through duplicate instruments or data taken from SAFRAN meteorological analysis or linear interpolation.
Relative humidity	SPSI MU-C1/MUTA.2 -> Vaisala HMP 35DE -> Vaisala HMP45D	1.5 m above snow (moved ~ weekly)		Yes	2.23	Relative Humidity set to 100 if measurement > 100.	Through duplicate instruments or data taken from SAFRAN meteorological analysis or linear interpolation.
Wind speed	Laumonier -> Thies Ultrasonic Anemometer	10 m	Yes		N/A		Through duplicate instruments or data taken from SAFRAN meteorological analysis or linear interpolation.
Air pressure	Meteo France sensor	Surface	N/A		N/A	N/A	N/A	Climatological value is used.
Evaluation data	Intrument / method	Measurement height / depth	% Gap	Comments
Automatic snow depth	Ultrasonic and laser depth rangers (<=5 sensors)	3 m	N/A
Manual snow depth	Snow pit		N/A	Up to three replicates.
Automatic SWE	Cosmic ray sensor (2 sensors)	0 m	N/A	EDF (Eau et Electricité de France) measurements.
Manual SWE	Snow pit		0	Up to three replicates.
Outgoing shortwave radiation	Kipp & Zonen CM14	1.2 m above snow (moved ~ weekly)	21.76	Heated and ventilated. When night-time outgoing shortwave radiation is < 0, it is forced to 0. The sensor is cleaned automatically hourly when air temperature is below 5°C.
Outgoing longwave radiation	Eppley PIR-> Kipp & Zonen CG4	1.2 m above snow (moved ~ weekly)	2.5	Heated and ventilated. The sensor is cleaned automatically hourly when air temperature is below 5°C.
Surface temperature	Testo term Pyroterm -> Campbell IR 120 (2 sensors), Heitronicks KT 15	1.2 m above snow (moved ~ weekly)	N/A
Soil temperature	PT100	10, 20, 50 cm depth	N/A

## Sheet: BERMS Old Aspen
Forcing data	Instrument	Instrument height	Heated	Ventilated	% gap filled	Gap filling method	Comments
Incoming shortwave radiation	Kipp & Zonen CM11	37 m	No	Yes	2.5	Moving window linear regression	Same time of day (forced through the origin) for all gap sizes using global solar radiation, incoming photosynthetically active radiation (PAR), or upwelling solar or PAR.
Incoming longwave radiation	Eppley PIR	37 m	No	Yes	1	Interpolated difference for small gaps (<24 periods, or 12h) and 5-day moving window linear regression for large gaps (24 periods or more)	Used downwelling longwave radiation, upwelling longwave radiation, down or upwelling shortwave above canopy, down or upwelling PAR above canopy
Precipitation	Belfort Universal (model 5915) and Belfort 3000 with Alter shield	4 m	No		0	Two gauges used to compile a complete time series	Undercatch corrected using wind speed at gauge for temperature < -2°C, linear transition from snow to rain between 0 and 2°C
Air temperature	Vaisala HMP35C / HMP45C with Gill shield	37 m		Yes	3	Interpolated difference for small gaps and moving window linear regression same time of day for large gaps.	Used air temperatures, shallow (<= 20cm depth) soil temperatures and tree temperatures at any level or location
Relative humidity	Vaisala HMP35C / HMP45C with Gill shield	37 m		Yes	0.8	Interpolated difference for small gaps and moving window linear regression same time of day for large gaps.	Only used relative humidity to fill gaps
Wind speed	RM Young 05103	38 m	No		0.9	Interpolated difference for small gaps and moving window linear regression same time of day for large gaps.	Only used wind speed to fill gaps
Air pressure	Setra SBP270	2 m	Indoors		1.2	Interpolated difference for small gaps and moving window linear regression same time of day for large gaps.	Only used air pressure to fill gaps
Evaluation data	Intrument	Measurement depth, height or distance	Comments
Automatic snow depth	Campbell Scientific model UDG01 in clearing prior to Sept. 24, 2000; 2 x Campbell Scientific SR50 in clearing, and in the sub-canopy over soil moisture pits	The UDG01 gauge in the clearing was 1.9-2.2 m above the surface. The SR50 gauge in the clearing was 1.96 m above the surface. The SR50 gauge under the canopy was 1.46 m above the surface.C12	Gap-filled and smoothed
Manual snow depth		45 points on 100 m transect
Automatic SWE	N/A
Manual SWE		5 cores on 100 m transect
Outgoing shortwave radiation	Kipp & Zonen CM11	31 m
Outgoing longwave radiation	Eppley PIR	31 m
Soil temperature	Campbell Scientific Copper-Constantan 105T thermocouples	2, 5, 10, 20, 50, 100 cm in two locations

## Sheet: BERMS Old Black Spruce
Forcing data	Instrument	Instrument height	Heated	Ventilated	% gap filled	Gap filling method	Comments
Incoming shortwave radiation	Kipp & Zonen CM11	25 m	No	Yes	6.1	Moving window linear regression	Same time of day (forced through the origin) for all gap sizes using global solar radiation, incoming photosynthetically active radiation (PAR), or upwelling solar or PAR.
Incoming longwave radiation	Eppley PIR	25 m	No	Yes	3.1	Interpolated difference for small gaps (<24 periods, or 12h) and 5-day moving window linear regression for large gaps (24 periods or more)	Used downwelling longwave radiation, upwelling longwave radiation, down or upwelling shortwave above canopy, down or upwelling PAR above canopy
Precipitation	Belfort Universal (model 5915) in 1997 and Belfort 3000 with Alter shield in subsequent years	4 m on roof of hut	No		0	Two gauges used to compile a complete time series	Undercatch corrected using wind speed at gauge for temperature < -2°C, linear transition from snow to rain between 0 and 2°C
Air temperature	Vaisala HMP35C / HMP45C with Gill shield	25 m		Yes	2.8	Interpolated difference for small gaps and moving window linear regression same time of day for large gaps.	Used air temperatures, shallow (<= 20cm depth) soil temperatures and tree temperatures at any level or location
Relative humidity	Vaisala HMP35C / HMP45C with Gill shield	25 m		Yes	6.7	Interpolated difference for small gaps and moving window linear regression same time of day for large gaps.	Only used relative humidity to fill gaps
Wind speed	RM Young 05103	26 m	No		2.9	Interpolated difference for small gaps and moving window linear regression same time of day for large gaps.	Only used wind speed to fill gaps
Air pressure	Setra SBP270	2 m	Indoors		2.2	Interpolated difference for small gaps and moving window linear regression same time of day for large gaps.	Only used air pressure to fill gaps
Evaluation data	Intrument	Measurement height or distance	Comments
Automatic snow depth	4 x Campbell Scientific SR50 in clearing, sub-canopy and over soil moisture pits		Gap-filled and smoothed
Manual snow depth		45 points on 100 m transect
Automatic SWE	N/A
Manual SWE		5 cores on 100 m transect
Outgoing shortwave radiation	Kipp & Zonen CM11	20 m
Outgoing longwave radiation	Eppley PIR	20 m
Soil temperature	Campbell Scientific Copper-Constantan 105T thermocouples	2, 5, 10, 20, 50, 100 cm in two locations

## Sheet: BERMS Old Jack Pine
Forcing data	Instrument	Instrument height	Heated	Ventilated	% gap filled	Gap filling method	Comments
Incoming shortwave radiation	Kipp & Zonen CM11	28 m	No	Yes	5.4	Moving window linear regression	Same time of day (forced through the origin) for all gap sizes using global solar radiation, incoming photosynthetically active radiation (PAR), or upwelling solar or PAR.
Incoming longwave radiation	Eppley PIR	28 m	No	Yes	0.8	Interpolated difference for small gaps (<24 periods, or 12h) and 5-day moving window linear regression for large gaps (24 periods or more)	Used downwelling longwave radiation, upwelling longwave radiation, down or upwelling shortwave above canopy, down or upwelling PAR above canopy
Precipitation	Belfort 3000 with Alter shield	2 m	No		0	Two gauges used to compile a complete time series	Undercatch corrected using wind speed at gauge for temperature < -2°C, linear transition from snow to rain between 0 and 2°C
Air temperature	Vaisala HMP45C with Gill shield	28 m		Yes	5.3	Interpolated difference for small gaps and moving window linear regression same time of day for large gaps.	Used air temperatures, shallow (<= 20cm depth) soil temperatures and tree temperatures at any level or location
Relative humidity	Vaisala HMP45C with Gill shield	28 m		Yes	1.2	Interpolated difference for small gaps and moving window linear regression same time of day for large gaps.	Only used relative humidity to fill gaps
Wind speed	RM Young 05103	29 m	No		0.7	Interpolated difference for small gaps and moving window linear regression same time of day for large gaps.	Only used wind speed to fill gaps
Air pressure	Setra SBP270	2 m	Indoors		0.4	Interpolated difference for small gaps and moving window linear regression same time of day for large gaps.	Only used air pressure to fill gaps
Evaluation data	Intrument	Measurement depth, height or distance	Comments
Automatic snow depth	2 x Campbell Scientific SR50 in clearing, sub-canopy and over soil moisture pits		Gap-filled and smoothed
Manual snow depth		45 points on 100 m transect
Automatic SWE	N/A
Manual SWE		5 cores on 100 m transect
Outgoing shortwave radiation	Kipp & Zonen CM11	23 m
Outgoing longwave radiation	Eppley PIR	23 m
Soil temperature	Campbell Scientific Copper-Constantan 105T thermocouples	2, 5, 10, 20, 50, 100 cm in two locations

## Sheet: Reynolds Mountain East
Forcing data	Instrument	Instrument height	Heated	Ventilated	% gap filled	Gap filling method	Comments
Incoming shortwave radiation	Eppley precision spectral pyranometer	4 m	No	No	<0.05%	Data from other sites within RCEW
Incoming longwave radiation			No	No	1	Model fitted to 3 years of measurements
Precipitation	Shielded and unshielded Belfort Universal gauges	3 m	No		<0.05%	Data from other sites within RCEW	Undercatch corrected by dual-gauge approach, partitioned into rain and snow based on dew point temperature
Air temperature	Vaisala HMP45	3 m		No	<0.05%	Data from other sites within RCEW
Relative humidity	Vaisala HMP45	3 m		No	<0.05%	Data from other sites within RCEW
Wind speed	MetOne 013/023	3 m	No		<0.05%	Data from other sites within RCEW
Air pressure			No		1	Average for site elevation
Evaluation data	Instrument / method	Height or depth	Comments
Automatic snow depth	Judd ultrasonic depth sensor	3 m
Manual snow depth	Snow course		Measured 2x/month (ca. first and fifteenth)
Automatic SWE	Snow pillow
Manual SWE	Snow course		Measured 2x/month (ca. first and fifteenth)
Soil temperature	Yellow Springs Instruments thermistor	30 cm	3-hour moving average to remove spikes

## Sheet: Sapporo
Forcing data	Instrument	Instrument height	Heated	Ventilated	% gap filled	Gap filling method	Comments
Incoming shortwave radiation	Kipp & Zonen, CMP21	1.58 m	No	Yes	N/A	Linear interpolation	1/ Anomalous data are set to missing values automatically by our original quality-check program 2/ Erroneous values are rejected after manual visual inspection and are set to be missing values as well.
Incoming longwave radiation	Kipp & Zonen, CG4	1.58 m	No	Yes	N/A	Linear interpolation	1/ Anomalous data are set to missing values automatically by our original quality-check program 2/ Erroneous values are rejected after manual visual inspection and are set to be missing values as well
Precipitation	Takeda, TK-1 (to 2008-2009), and GEONOR, T-200B (from 2009-2010)	1.88 m (TK-1) 2.4 m (T-200B)	Yes (for TK-1) No (for T-200B)		0	Linear interpolation	Corrected for gauge efficiency as functions of gauge type and wind speed. These correction methods were taken from the following studies: TK-1 (RT-3 type): Yokoyama et al. (2003), Performance of Japanese precipitation gauges in winter [in Japanese with English abstract], Seppyo, 65, 303–316. T-200B: Morin et al. (2012), An 18-yr long (1993–2011) snow and meteorological dataset from a mid-altitude…
Air temperature	Vaisala, HMP45D	1.5 m		Yes	N/A	Linear interpolation	The sensor is protected by an aspirated radiation shield. 1/ Anomalous data are set to missing values automatically by our original quality-check program 2/ Erroneous values are rejected after manual visual inspection and are set to be missing values as well.
Relative humidity	Vaisala, HMP45D	1.5 m		Yes	N/A	Linear interpolation	1/ Anomalous data are set to missing values automatically by our original quality-check program 2/ Erroneous values are rejected after manual visual inspection and are set to be missing values as well.
Wind speed	Met One, 010C	1.5 m	No		N/A	Linear interpolation	1/ Anomalous data are set to missing values automatically by our original quality-check program 2/ Erroneous values are rejected after manual visual inspection and are set to be missing values as well.
Air pressure	Met One, 091	1.85 m	No		N/A	Linear interpolation	1/ Anomalous data are set to missing values automatically by our original quality-check program 2/ Erroneous values are rejected after manual visual inspection and are set to be missing values as well.
					May to October data filled with bias-corrected WFDEI
Evaluation data	Intrument / method	Measurement height	Comments
Automatic snow depth	Campbell, SR50	2.0 m
Outgoing shortwave radiation	Kipp & Zonen, CMP21	2.5 m
Snow surface temperature	Kipp & Zonen, CG4	2.5 m	Snow surface temperature is calculated from measured downward and upward longwave radiations by considering the Stefan–Boltzmann law, where the snow surface emissivity is assumed to be 0.98 throughout the period.
Manual snow depth	Snow pit
Manual SWE	Snow pit

## Sheet: Senator Beck
Forcing data	Instrument	Instrument height	Heated	Ventilated	% gap filled	Gap filling method	Comments
Incoming shortwave radiation	Kipp & Zonen CM21	9.4 m	No	No	0.0188	Direct replacement from Swamp Angel; else fill with value from 24 hours prior; else fill with average value for that month and hour	Negative values not included in gap filled percent (these were set to 0, almost always at night). Sensor recalibrated in Summer 2007, 2012, 2016.
Incoming longwave radiation	Kipp & Zonen CG4	9.4 m	No	No	0.0193	Linear regression from observations at Swamp Angel; else fill with value from 24 hours prior; else fill with average value for that month and hour.	Sensor recalibrated in Summer 2007, 2012, 2016.
Precipitation	N/A	N/A	N/A		1	Direct insertion from Swamp Angel.	Swamp Angel precipitation measurements used.
Air temperature	Vaisala HMP50YA (after April 14, 2010) and CS500-U (Oct 16, 2004 - April 14, 2010)	3.8 m		No	<0.01%	Linear regression from observations at upper temp measurement on same tower or from Swamp Angel.	Naturally ventilated, not corrected for radiative forcing.
Relative humidity	Vaisala HMP50YA (after April 14, 2010) and CS500-U (Oct 16, 2004 - April 14, 2010)	3.8 m		No	0.0173	Linear regression from observations at upper temp measurement on same tower or from Swamp Angel; else assume 50% (very rare case).
Wind speed	RM Young 05103-5	4.0 m	No		<0.01%	Linear regression from observations at upper temp measurement on same tower; else fill using quantile matching with nearby ridge site at Putney.
Air pressure	N/A	N/A	N/A		1	Constant value computed based on elevation	Average for site elevation
Evaluation data	Instrument / method	Height or depth	Comments
Automatic snow depth	Campbell Scientific SR50	3.6 m	New transducer by CSI: summer 2007, Oct 2008, Jan 24 - Feb 4, 2011. "loaner" sensor used in winter 2007-2008
Manual snow depth	Snow pit	N/A	N/A
Manual SWE	Snow pit	N/A	N/A
Outgoing shortwave radiation	Kipp & Zonen CM21	3.6 m	Sensor recalibrated in Summer 2007, 2012, 2016.
Infrared surface temperature	AlpuG SnowSurf	3.5 m	Sensor emissivity fixed at 0.98 for snow surfaces.
Soil temperature	Campbell Scientific 107	0, 10, 20, 25 cm	N/A

## Sheet: Sodankyla
Forcing data	Instrument	Instrument height	Heated	Ventilated	% gap filled	Gap filling method	Comments
Incoming shortwave radiation	Kipp & Zonen CM11	14 m	No	Yes	0.61	Linear interpolation (<4 hours) or nearby instruments	Reduced to account for shading by trees around the snow pit site
Incoming longwave radiation	Kipp & Zonen CG4	14 m	No	Yes	8.65	Bias-corrected ERA-Interim	Increased to account for thermal emission from trees around the snow pit site
Precipitation	Vaisala FD12P	2 m	No		0.67	Linear interpolation (<4 hours) or nearby instruments	Scaled (yearly factor) to match measured SWE. Snow - rain transition at 0°C
Air temperature	Pentronic PT100	2 m		No	0.11	Linear interpolation (<4 hours) or nearby instruments
Relative humidity	Vaisala HMP35D	2 m		No	0.19	Linear interpolation (<4 hours) or nearby instruments
Wind speed	Vaisala WAA25	22 m	Yes		0.12	Linear interpolation (<4 hours) or nearby instruments	Reduced to account for shading by trees around the snow pit site
Air pressure	Vaisala PTB201A	1 m	No		0.11	Linear interpolation (<4 hours) or nearby instruments
Evaluation data	Instrument / method	Measurement height	Comments
Automatic snow depth	Campbell Scientific SR50
Manual snow depth	Snow pit
Automatic SWE	Astrock GWI		Calibrated to manual measurements
Manual SWE	Snow pit
Soil temperature	Decagon devices 5TE	5, 10, 20 40, 80 cm

## Sheet: Swamp Angel
Forcing data	Instrument	Instrument height	Heated	Ventilated	% gap filled	Gap filling method	Comments
Incoming shortwave radiation	Kipp & Zonen CM21	5.7 m	No	No	0.056	Direct replacement from Senator Beck Study Plot; else fill with value from 24 hours prior; else fill with average value for that month and hour.	Negative values not included in gap filled percent (these were set to 0, almost always at night). Sensor recalibrated in Summer 2007, 2012, 2016.
Incoming longwave radiation	Kipp & Zonen CG4	5.7 m	No	No	0.056	Linear regression from observations at Sen. Beck Study Plot; any remaining gaps filled with average value for that month and hour.	Sensor recalibrated in Summer 2007, 2012, 2016.
Precipitation	ETI Noah II with Alter shield	4.5 m	No		0.0002	Direct insertion from nearby SNOTEL site (Red Mountain Pass).	Not corrected for undercatch, partitioned into rain and snow according to dew point temperature.
Air temperature	Vaisala CS500	3.4 m		No	0.0102	Linear regression from observations at upper temp measurement on same tower or from Senator Beck Study Plot.	Naturally ventilated, not corrected for radiative forcing.
Relative humidity	Vaisala CS500	3.4 m		No	0.0102	Linear regression from observations at upper temp measurement on same tower or from Senator Beck Study Plot; else assume 50% (very rare case).
Wind speed	RM Young 05103-5	3.8 m	No		0.0003	Linear regression from observations at upper temp measurement on same tower; else fill using quantile matching with nearby ridge site at Putney.
Air pressure	N/A	N/A	N/A		1	Constant value computed based on elevation.	Average for site elevation
Evaluation data	Instrument / method	Height or depth	Comments
Automatic snow depth	Campbell Scientific SR50	3.2 m	New transducer by CSI in Oct 2007, Aug 2008, Jul 2011, Jul 2013, Sep 2014, Sep 2015
Manual snow depth	Snow pit	N/A	N/A
Manual SWE	Snow pit	N/A	N/A
Outgoing shortwave radiation	Kipp & Zonen CM21	3.1 m	Sensor recalibrated in Summer 2007, 2012, 2016.
Infrared surface temperature	AlpuG SnowSurf	3.2 m	Sensor emissivity fixed at 0.98 for snow surfaces.
Soil temperature	Campbell Scientific 107	0, 10, 20, 40 cm	N/A

## Sheet: WFJ
Forcing data	Instrument	Instrument height	Heated	Ventilated	% gap filled	Gap filling method	Comments
Incoming shortwave radiation	Kipp & Zonen CM21	5 m	Yes	Yes	< 1 %	Redundant measurements
Incoming longwave radiation	Eppley PIR	5 m	Yes	Yes	< 1 %	Redundant measurements
Precipitation	Lambrecht Joss-Tognini rain gauge	2 m above snow surface	Yes		< 1 %	Values from Davos	Forland et al. (1996) undercatch correction based on temperature and wind speed. Rain / snow threshold at 1.2°C
	Ott pluvio 2 (MeteoSwiss)	3 m above ground	Yes		N/A	N/A	Since 2016
Air temperature	Meteolabor Thygan	4.5 m		Yes	< 1 %	Redundant measurements
Relative humidity	Meteolabor Thygan	4.5 m		Yes	< 1 %	Redundant measurements
Wind speed	Young wind monitor	5.5 m	No		N/A	Redundant measurements
Air pressure	Campbell Scientific CS100	2 m	No		< 1 %	Redundant measurements	Since 1998, located in hut nearby study plot (same elevation)
Evaluation data	Instrument / method	Measurement height	Comments
Automatic snow depth	Campbell Scientific SR50A	4.5 m
Manual snow depth	Snow stake read daily		Same location since 1941
Automatic SWE	Sommer Messtechnik Snow pillow	flush with surface	Since 2005
Automatic SWE	Sommer Messtechnik Snow Scale SSG	flush with surface	Since 2010
Manual SWE	Bi-weekly snow pit		Scaled to manual snow depth daily read
Outgoing shortwave radiation	Kipp & Zonen CM21	5 m
Outgoing longwave radiation	Eppley PIR	5 m
Soil temperature	Campbell Scientific T 107 temperature probe	Surface
