# Supplementary material for: Meteorological and evaluation datasets for snow modelling at 10 reference sites: description of in situ and bias-corrected reanalysis data
Source: Copernicus journal article supplement (doi:10.5194/essd-11-865-2019), 2019-06-17
Supplement: Supplementary file [file essd-11-865-2019-supplement-title-page.pdf › essd-11-865-2019-supplement-title-page.pdf]

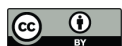

## *Supplement of*

# **Meteorological and evaluation datasets for snow modelling at 10 reference sites: description of in situ and bias-corrected reanalysis data**

**Cécile B. Ménard et al.**

*Correspondence to:* Cécile B. Ménard ([cecile.menard@ed.ac.uk](mailto:cecile.menard@ed.ac.uk))

- [essd-11-865-2019-supplement-title-page.pdf](#)
- [Sites\\_metadata.xlsx](#)

The copyright of individual parts of the supplement might differ from the CC BY 4.0 License.
